# Supplementary material for: Modeling anthropogenically controlled secondary organic aerosols in a megacity: a simplified framework for global and climate models
Source: Copernicus journal article supplement (doi:10.5194/gmd-4-901-2011), 2011-10-24
Supplement: Supplementary file 1 [file gmd-4-901-2011-supplement.pdf]

Supplementary Information for “Modeling anthropogenically-controlled secondary organic aerosols in a megacity: a simplified framework for global and climate models” by A. Hodzic and J.L. Jimenez

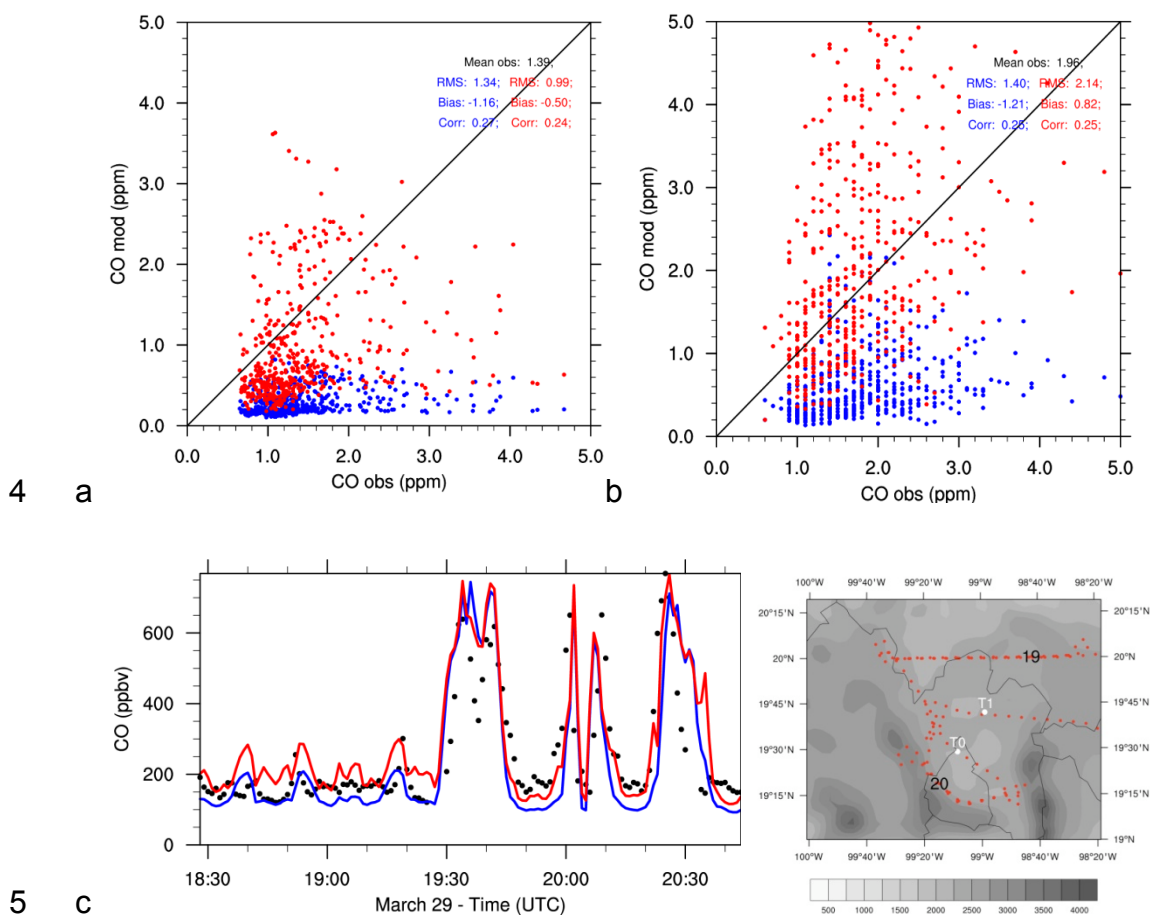

SI-Fig 1: Comparisons of observed and predicted CO levels at two cities in Central Mexico and outside of Mexico City, Puebla (a) and Toluca (b), and along the C130 regional flight of March 29, 2006 (c). Model results using the default NEI emission inventory are shown in blue, whereas the results using the factor of 5 increased CO regional emissions are displayed in red.

10

11 SI-Table 1: Comparison of the timescales and SOA production between OPT, SPR and ROB-like  
 12 simulations. OH concentrations are assumed to be equal to the typical Mexico City value of  $1.5 \times 10^6$   
 13 molecules  $\text{cm}^{-3}$ .

|                              | OPT                                           | SPR  | ROB-like |
|------------------------------|-----------------------------------------------|------|----------|
| <i>Times scale (days)</i>    | 0.62                                          | 1.54 | 1.54     |
| <i>Emissions per g of CO</i> | 0.08                                          | 0.20 | 0.08     |
| Times in days (hours)        | Exponential function SOA production (mg/g CO) |      |          |
| 0.2 (4.8h)                   | 22                                            | 24   | 10       |
| 0.4 (9.6h)                   | 38                                            | 46   | 18       |
| 0.6 (14.4h)                  | 50                                            | 65   | 26       |
| 0.8 (19.2h)                  | 58                                            | 81   | 32       |
| 1.0 (24.0h)                  | 64                                            | 96   | 38       |
| 1.2 (28.8h)                  | 69                                            | 108  | 43       |
| 1.4 (33.6h)                  | 72                                            | 119  | 48       |
| 1.6 (38.4h)                  | 74                                            | 129  | 52       |
| 1.8 (43.2h)                  | 76                                            | 138  | 55       |
| 2.0 (48.0h)                  | 77                                            | 145  | 58       |

14

15
