# Supplementary material for: Modeling anthropogenically controlled secondary organic aerosols in a megacity: a simplified framework for global and climate models
Source: Copernicus journal article supplement (doi:10.5194/gmd-4-901-2011), 2011-10-24
Supplement: Supplementary file [file gmd-4-901-2011-supplement.pdf]

1 Supplementary Information for “Modeling anthropogenically-controlled secondary  
2 organic aerosols in a megacity: a simplified framework for global and climate  
3 models” by A. Hodzic and J.L. Jimenez

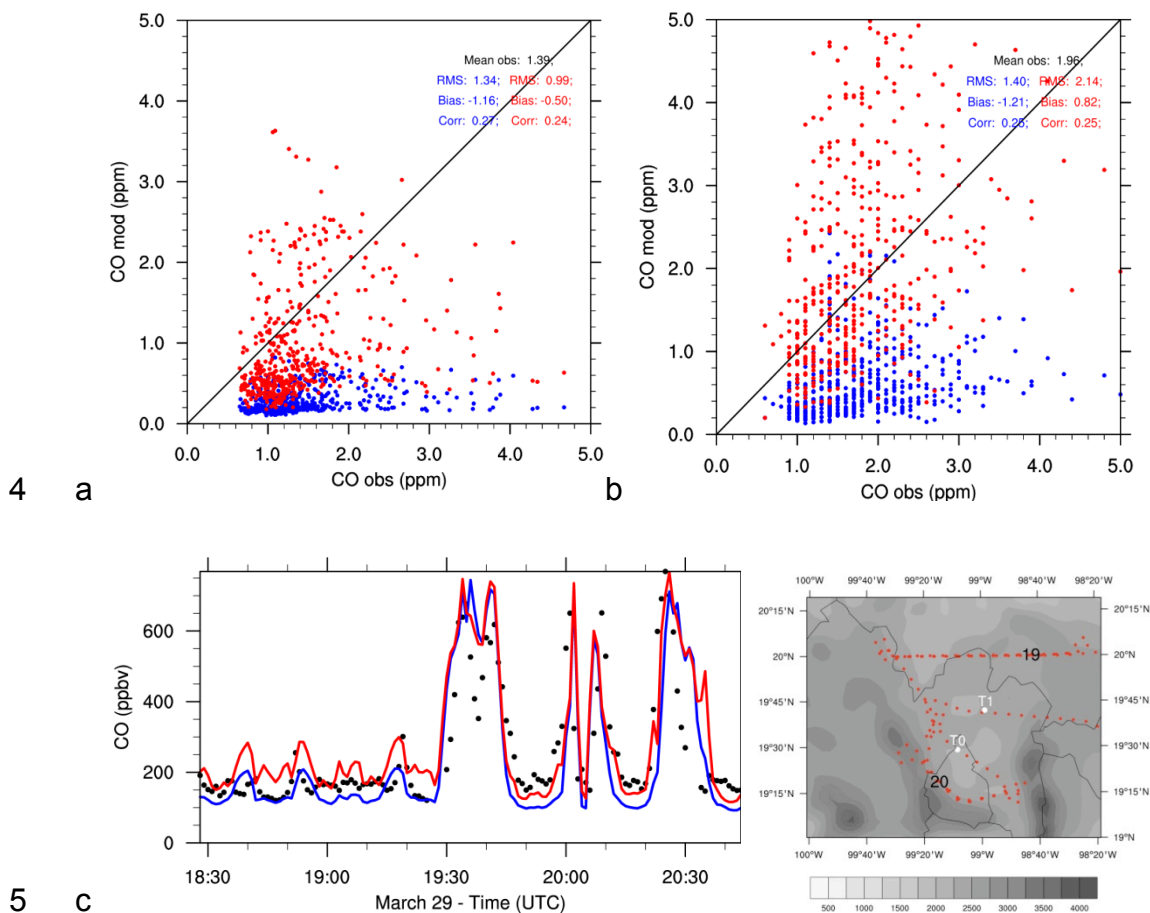

6 **SI-Fig 1: Comparisons of observed and predicted CO levels at two cities in Central Mexico and**  
7 **outside of Mexico City, Puebla (a) and Toluca (b), and along the C130 regional flight of March 29,**  
8 **2006 (c). Model results using the default NEI emission inventory are shown in blue, whereas the**  
9 **results using the factor of 5 increased CO regional emissions are displayed in red.**

10

11 **SI-Table 1: Comparison of the timescales and SOA production between OPT, SPR and ROB-like**  
 12 **simulations. OH concentrations are assumed to be equal to the typical Mexico City value of  $1.5 \times 10^6$**   
 13 **molecules  $\text{cm}^{-3}$ .**

|                              | OPT                                                  | SPR  | ROB-like |
|------------------------------|------------------------------------------------------|------|----------|
| <i>Times scale (days)</i>    | 0.62                                                 | 1.54 | 1.54     |
| <i>Emissions per g of CO</i> | 0.08                                                 | 0.20 | 0.08     |
| <b>Times in days (hours)</b> | <b>Exponential function SOA production (mg/g CO)</b> |      |          |
| 0.2 (4.8h)                   | 22                                                   | 24   | 10       |
| 0.4 (9.6h)                   | 38                                                   | 46   | 18       |
| 0.6 (14.4h)                  | 50                                                   | 65   | 26       |
| 0.8 (19.2h)                  | 58                                                   | 81   | 32       |
| 1.0 (24.0h)                  | 64                                                   | 96   | 38       |
| 1.2 (28.8h)                  | 69                                                   | 108  | 43       |
| 1.4 (33.6h)                  | 72                                                   | 119  | 48       |
| 1.6 (38.4h)                  | 74                                                   | 129  | 52       |
| 1.8 (43.2h)                  | 76                                                   | 138  | 55       |
| 2.0 (48.0h)                  | 77                                                   | 145  | 58       |

14

15
